# Supplementary material for: Characterizing the role of rice NRAMP5 in Manganese, Iron and Cadmium Transport
Source: PubMed Central journal article supplement — Sci Rep. 2012 Feb 24;2:286. doi: 10.1038/srep00286 (PMC3285952; doi:10.1038/srep00286), 2012-02-24
Supplement: srep00286-s1.pdf [file srep00286-s1.pdf]

Supplementary information for manuscript

**Characterizing the role of rice NRAMP5 in Manganese, Iron and Cadmium Transport**

**Yasuhiro Ishimaru, Ryuichi Takahashi, Khurram Bashir, Hugo Shimo, Takeshi Senoura, Kazuhiko Sugimoto, Kazuko Ono, Masahiro Yano, Satoru Ishikawa, Tomohito Arao, Hiromi Nakanishi, Naoko K. Nishizawa**

Includes

Supplementary Table-1  
Supplementary Table-2  
Supplementary Figure-1  
Supplementary Figure-2  
Supplementary Figure-3  
Supplementary Figure-4

**Supplementary Table 1. Gene expression patterns related to metal uptake transporters under Cd added condition**

The induction ratios for the WT plants were calculated as the relative increase or decrease in expression in response to the addition of 10  $\mu$ M CdCl<sub>2</sub> for two weeks, compared to control condition (+Cd/C). The values are the means of two biological replicates and color swaps.

| Accession No.               | Gene name       | +Cd/C |            | +Cd/C |           | C Root | C Shoot |
|-----------------------------|-----------------|-------|------------|-------|-----------|--------|---------|
|                             |                 | Root  |            | Shoot |           | signal | signal  |
| <b>OsNRAMP transporters</b> |                 |       |            |       |           |        |         |
| AK103557                    | <i>OsNRAMP1</i> | 15.0  | $\pm 0.7$  | 95.5  | $\pm 9.1$ | 274    | 29      |
| AK065481                    | <i>OsNRAMP2</i> | 0.9   | $\pm 0.0$  | 1.3   | $\pm 0.0$ | 603    | 553     |
| AK070574                    | <i>OsNRAMP3</i> | 1.2   | $\pm 0.1$  | 1.1   | $\pm 0.1$ | 5429   | 556     |
| AK102180                    | <i>OsNRAMP4</i> | 0.8   | $\pm 0.0$  | 1.3   | $\pm 0.6$ | 3119   | 3       |
| AK070788                    | <i>OsNRAMP5</i> | 0.2   | $\pm 0.0$  | 0.4   | $\pm 0.0$ | 14308  | 565     |
| AK068118                    | <i>OsNRAMP6</i> | 0.9   | $\pm 0.0$  | 0.8   | $\pm 0.1$ | 433    | 486     |
| AK071485                    | <i>OsNRAMP7</i> | 0.6   | $\pm 0.0$  | 0.8   | $\pm 0.0$ | 682    | 183     |
| <b>OsZIP transporters</b>   |                 |       |            |       |           |        |         |
| AK107681                    | <i>OsIRT1</i>   | 0.8   | $\pm 0.0$  | 1.3   | $\pm 0.0$ | 6938   | 188     |
| CI162465                    | <i>OsIRT2</i>   | 5.0   | $\pm 0.9$  | 10.2  | $\pm 0.9$ | 49     | 6       |
| AY302058                    | <i>OsZIP1</i>   | 0.7   | $\pm 0.0$  | 1.1   | $\pm 0.1$ | 10706  | 46      |
| AK121551                    | <i>OsZIP2</i>   | 2.8   | $\pm 0.0$  | 2.0   | $\pm 0.4$ | 1126   | 382     |
| AK069804                    | <i>OsZIP3</i>   | 80.4  | $\pm 17.8$ | 4.9   | $\pm 0.4$ | 3      | 24      |
| AK105258                    | <i>OsZIP4</i>   | 1.5   | $\pm 0.1$  | 1.0   | $\pm 0.1$ | 293    | 61      |
| AK070864                    | <i>OsZIP5</i>   | 1.1   | $\pm 0.1$  | 1.0   | $\pm 0.0$ | 1438   | 304     |
| AK103730                    | <i>OsZIP6</i>   | 0.6   | $\pm 0.0$  | 1.3   | $\pm 0.0$ | 782    | 188     |
| AK071272                    | <i>OsZIP7</i>   | 0.5   | $\pm 0.1$  | 1.5   | $\pm 0.2$ | 1168   | 125     |
| AY327038                    | <i>OsZIP8</i>   | 3.4   | $\pm 0.4$  | 4.6   | $\pm 0.3$ | 187    | 324     |
| Os05g0472400                | <i>OsZIP9</i>   | 0.5   | $\pm 0.1$  | 1.0   | $\pm 0.4$ | 20     | 45      |
| Os06g0566300                | <i>OsZIP10</i>  | 1.0   | $\pm 0.8$  | 1.0   | $\pm 0.2$ | 10     | 4       |
| AK099474                    | <i>OsZIP11</i>  | 0.7   | $\pm 0.1$  | 1.0   | $\pm 0.2$ | 1118   | 393     |

**OsYSL transporters**

|          |                |          |          |       |      |
|----------|----------------|----------|----------|-------|------|
| AK121040 | <i>OsYSL1</i>  | 1.1 ±0.7 | 1.0 ±0.4 | 3     | 3    |
| CI446246 | <i>OsYSL2</i>  | 2.3 ±1.9 | 1.1 ±0.8 | 3     | 4    |
| AK068865 | <i>OsYSL4</i>  | 1.0 ±0.2 | 0.9 ±0.2 | 3     | 3    |
| AK108750 | <i>OsYSL5</i>  | 1.0 ±0.1 | 1.0 ±0.1 | 405   | 145  |
| AK100148 | <i>OsYSL6</i>  | 0.9 ±0.1 | 1.0 ±0.1 | 2656  | 2180 |
| AK070691 | <i>OsYSL7</i>  | 1.2 ±0.0 | 0.6 ±0.1 | 41    | 26   |
| AK072347 | <i>OsYSL8</i>  | 0.8 ±0.1 | 1.7 ±0.2 | 14    | 78   |
| AK120923 | <i>OsYSL9</i>  | 0.7 ±0.0 | 0.9 ±0.0 | 1758  | 286  |
| AK069645 | <i>OsYSL10</i> | 2.9 ±3.2 | 1.3 ±0.8 | 3     | 4    |
| AK069437 | <i>OsYSL12</i> | 0.3 ±0.1 | 1.1 ±0.2 | 1541  | 127  |
| AK067235 | <i>OsYSL13</i> | 2.0 ±0.1 | 1.9 ±0.0 | 98    | 31   |
| AK063464 | <i>OsYSL15</i> | 1.8 ±0.1 | 4.4 ±0.8 | 7108  | 3    |
| AK070304 | <i>OsYSL16</i> | 0.3 ±0.0 | 1.6 ±0.1 | 22152 | 3264 |
| AK070618 | <i>OsYSL18</i> | 1.0 ±0.2 | 0.9 ±0.2 | 3     | 3    |

**OsCOPT transporters**

|              |                  |          |          |       |      |
|--------------|------------------|----------|----------|-------|------|
| Os01g0770700 | <i>COPT like</i> | 0.4 ±0.1 | 2.1 ±0.1 | 17320 | 1793 |
| AK109200     | <i>COPT like</i> | 1.0 ±0.2 | 0.9 ±0.2 | 4     | 4    |
| AK107848     | <i>COPT like</i> | 2.9 ±0.2 | 1.3 ±0.3 | 808   | 14   |
| AK069588     | <i>COPT like</i> | 2.8 ±0.3 | 1.5 ±0.2 | 3010  | 1352 |

**Supplementary Table 2. Fe-regulated gene expression patterns in OsNRAMP5i plants**

The induction ratios were calculated as the relative increase or decrease in expression of OsNRAMP5i plants as compared to WT (NRAMP5i/WT) in var. Tsukinohikari. The values are the means of three biological replicates and color swaps.

| Accession No.                        | Gene name       | NRAMP5i/WT |      | NRAMP5i/WT |       | WT Root | WT Shoot |
|--------------------------------------|-----------------|------------|------|------------|-------|---------|----------|
|                                      |                 | Root       |      | Shoot      |       | signal  | signal   |
| <b>Transporters</b>                  |                 |            |      |            |       |         |          |
| AK070788                             | <i>OsNRAMP5</i> | 0.3        | ±0.0 | 0.3        | ±0.0  | 15827   | 200      |
| AK103557                             | <i>OsNRAMP1</i> | 7.0        | ±2.2 | 14.6       | ±11.2 | 765     | 21       |
| AK107681                             | <i>OsIRT1</i>   | 2.7        | ±0.3 | 0.9        | ±0.1  | 13351   | 266      |
| CI162465                             | <i>OsIRT2</i>   | 5.6        | ±1.4 | 1.5        | ±0.5  | 210     | 11       |
| CI446246                             | <i>OsYSL2</i>   | 6.2        | ±2.6 | 3.5        | ±2.9  | 23      | 4        |
| AK063464                             | <i>OsYSL15</i>  | 4.8        | ±0.8 | 0.9        | ±0.3  | 8946    | 3        |
| <b>Iron deficiency related genes</b> |                 |            |      |            |       |         |          |
| AK103636                             | <i>MIR</i>      | 12.1       | ±7.1 | 4.4        | ±3.0  | 69      | 4        |
| AK068159                             | <i>OsFRO2</i>   | 1.1        | ±0.4 | 8.2        | ±4.8  | 4       | 9        |
| AK073385                             | <i>OsIRO2</i>   | 3.4        | ±0.4 | 15.0       | ±12.0 | 231     | 3        |
| AK112069                             | <i>OsNAS1</i>   | 4.9        | ±2.0 | 1.2        | ±0.3  | 30366   | 29       |
| AK112011                             | <i>OsNAS2</i>   | 5.6        | ±2.3 | 3.7        | ±3.0  | 25721   | 4        |
| AB206814                             | <i>OsNAAT1</i>  | 5.2        | ±2.0 | 5.0        | ±3.0  | 4234    | 427      |
| AK073738                             | <i>OsDMAS1</i>  | 4.2        | ±1.2 | 1.2        | ±0.2  | 1970    | 84       |

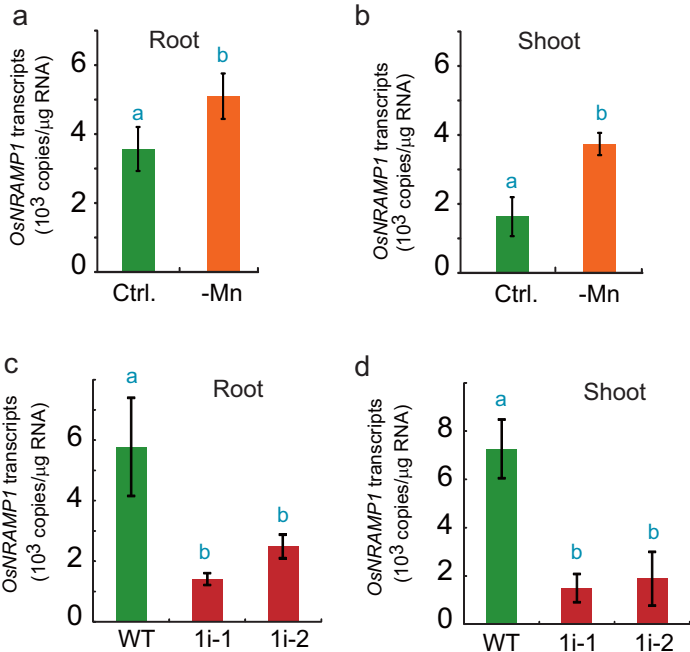

Supplementary Figure 1

### *OsNRAMP1* expression in *OsNRAMP1i* plants

(a-b) Expression pattern of *OsNRAMP1* under Mn-deficient condition (-Mn) in roots (a) and shoot (b), compared to control condition (Ctrl.). (c-d) *OsNRAMP1* in the roots (c) and the shoot (d) of WT and *OsNRAMP1i* (1i-1, 1i-2) plants. Error bars represent S.D. Columns bars followed by different letters are statistically different according to analysis of variance followed by SNK test (a,  $p=0.0445$ ; b,  $p=0.0050$ ; c,  $p=0.0011$ ; d,  $p=0.0007$ );  $n=3$ .

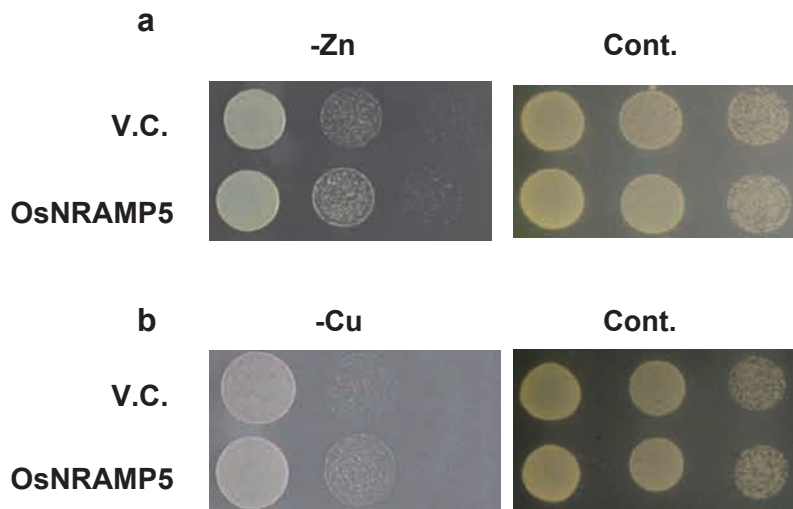

Supplementary Figure 2

Serial dilutions of yeast cells for  $\Delta zrt3zrt4$  (Zinc uptake mutant) (a),  $\Delta ctr1$  (Cu uptake mutant) (b), transformed with empty vector (V.C.) or OsNRAMP5.

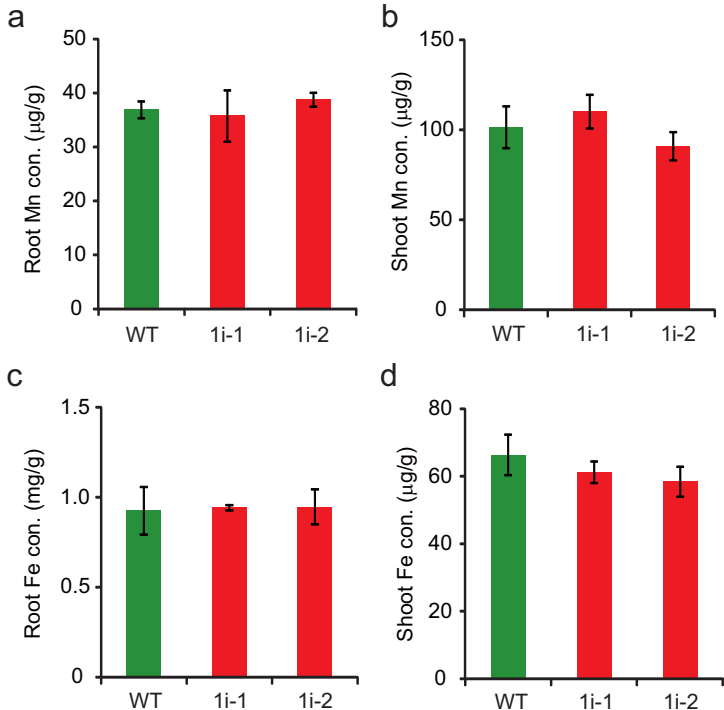

Supplementary Figure 3

Mn and Fe concentration of OsNRAMP1i plants

Root (a) and shoot (b) Mn and root (c) and shoot (d) Fe concentration of WT and OsNRAMP1i plants (1i-1, 1i-2). Error bars represent S.D. (n=3).

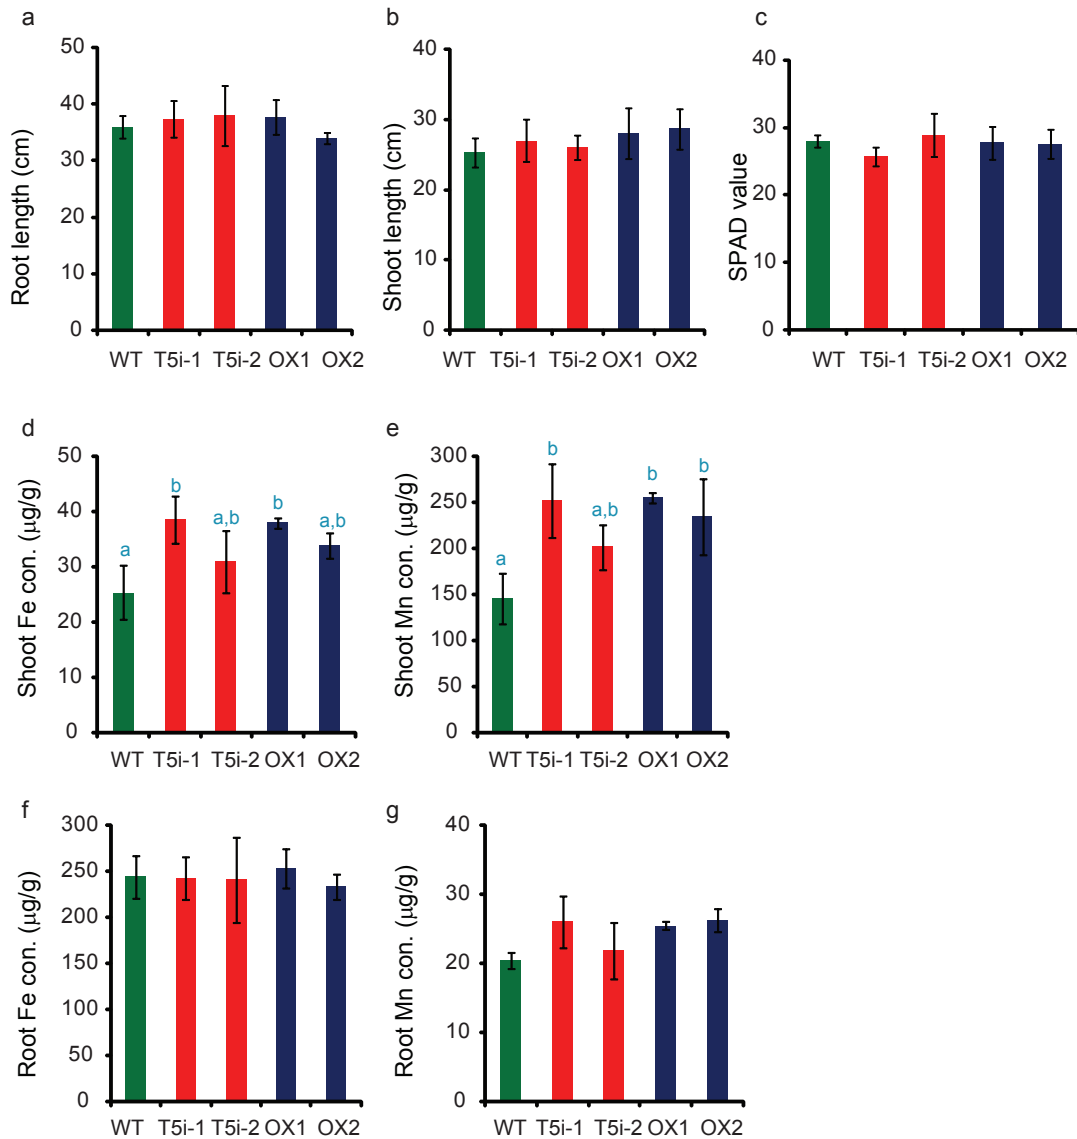

Supplementary figure 4

Phenotype and Metal concentration of WT, OsNRAMP5i and OsNRAMP5OX plants grown under Fe deficient conditions. Root length (a), shoot length (b), SPAD value (c), Shoot (d) and root (f) Fe concentration; shoot (e) and root (g) Mn concentration. Error bars represent the SD. Columns bars followed by different letters are statistically different according to analysis of variance followed by SNK test (d,  $p=0.0139$ ; e,  $p=0.0073$ );  $n=3$ .
